# Supplementary material for: All-Trans Retinoic Acid Increases DRP1 Levels and Promotes Mitochondrial Fission
Source: MDPI journal article supplement (doi:10.3390/cells10051202), 2021-05-14
Supplement: s1 [file s1]

## Supplementary Materials

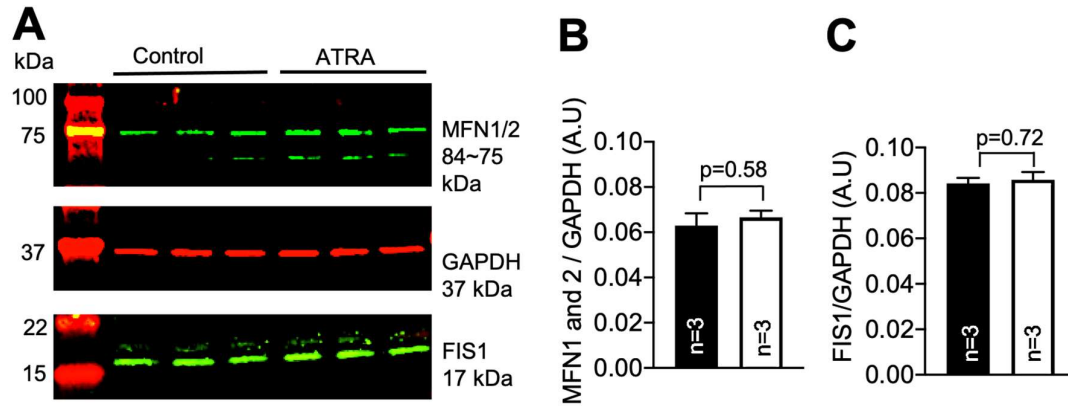

**Figure S1.** MFN1/2 and FIS1 levels in HEK293 cells treated with ATRA or DMSO (vehicle control). (A) Western blots of MFN1/2 (upper panel), GAPDH (middle panel) and FIS1 (lower panel). (B and C) There was no effect of ATRA on MFN1/2 (B,  $p = 0.58$ , unpaired 2-sample t-test) and FIS1 (C,  $p = 0.72$ , vs. control; unpaired 2-sample t-test).

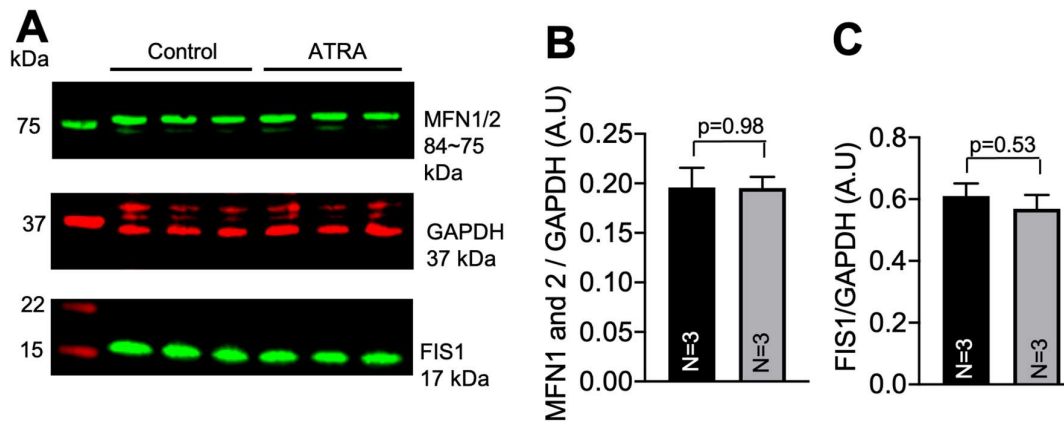

**Figure S2.** MFN1/2 and FIS1 levels in mouse hearts treated with ATRA or corn oil (vehicle control) via i.p. injection. (A) Western blots of MFN1/2 (upper panel), GAPDH (middle panel) and FIS1 (lower panel). (B) There was no effect of ATRA on MFN1/2 ( $p = 0.98$  vs. control; unpaired 2-sample t-test) and (C) FIS1 ( $p = 0.53$  vs. control; unpaired 2-sample t-test).
